# Supplementary material for: Sex-Specific Relationship between the Cardiorespiratory Fitness and Plasma Metabolite Patterns in Healthy Humans—Results of the KarMeN Study
Source: MDPI journal article supplement (doi:10.3390/metabo11070463), 2021-07-17

## File S2: Graphical overview of associations between the VO<sub>2</sub>peak and plasma metabolites

**Partial correlations:** Direction and strength of bivariate associations between the VO<sub>2</sub>peak and each metabolites, expressed as partial Pearson correlation coefficients with 95% confidence intervals of Van der Waerden-transformed variables.

**Contribution to PLS-model:** Importance of contribution of each metabolite to the multivariate association in the obtained PLS models with the VO<sub>2</sub>peak, expressed as the negative logarithm of relative frequencies of permutation-obtained rank products below measured rank products.

- F\* Females adjusted for age and menopausal status  
 F\*\* Females adjusted for age, menopausal status and the 21 phenotypical and clinical parameters  
 M\* Males adjusted for age  
 M\*\* Males adjusted for age and the 21 phenotypical and clinical parameters

### Major Metabolic Pathways:

Lipid metabolism      Amino acid metabolism      Xenobiotics and related metabolism  
 Energy metabolism      Carbohydrate metabolism      Mammalian-microbial cometabolism  
 Nucleotide metabolism      Cofactors and vitamins metabolism      Unknown

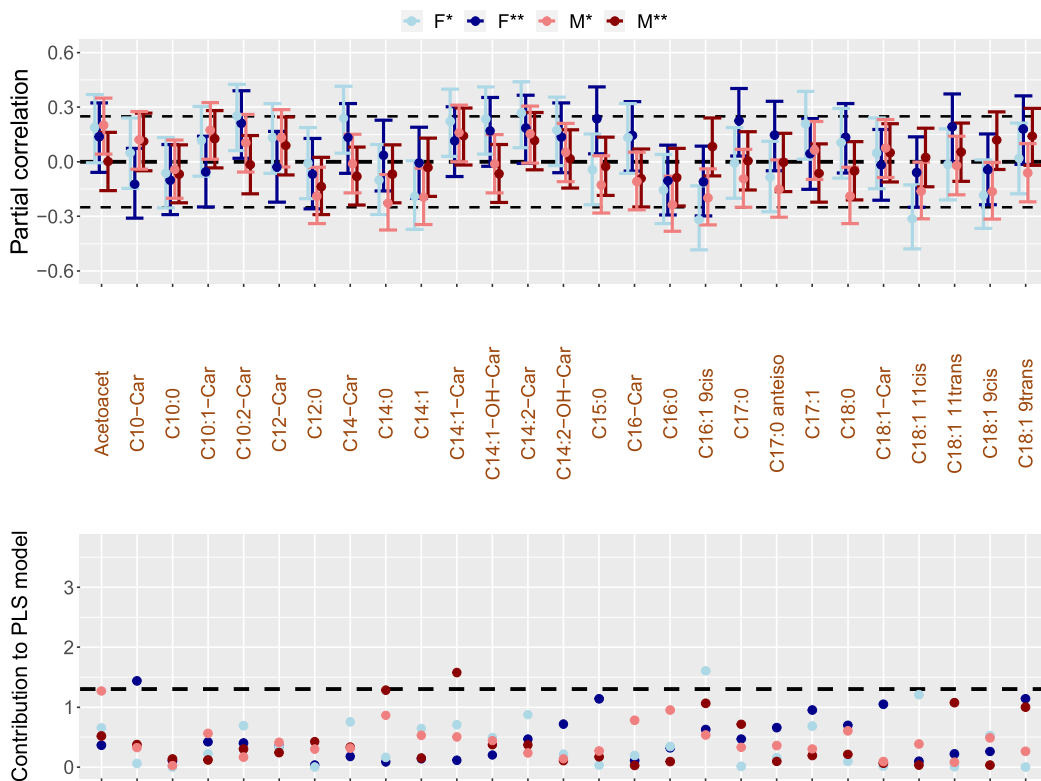

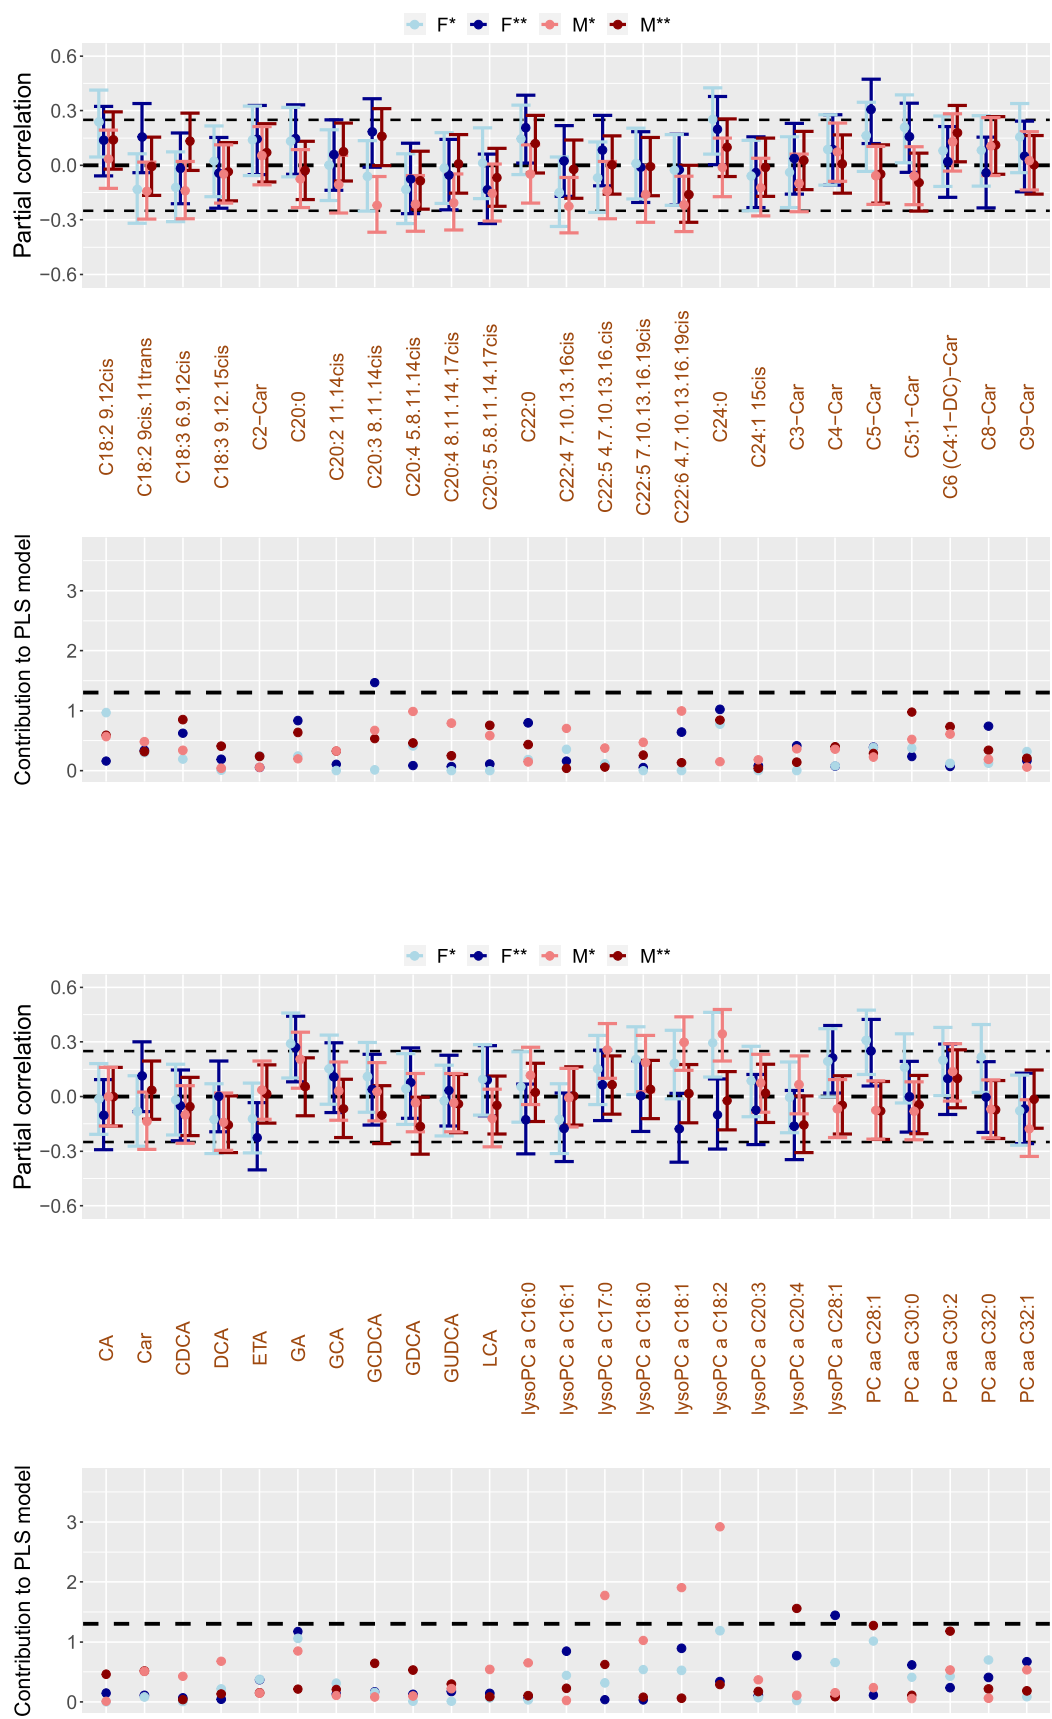

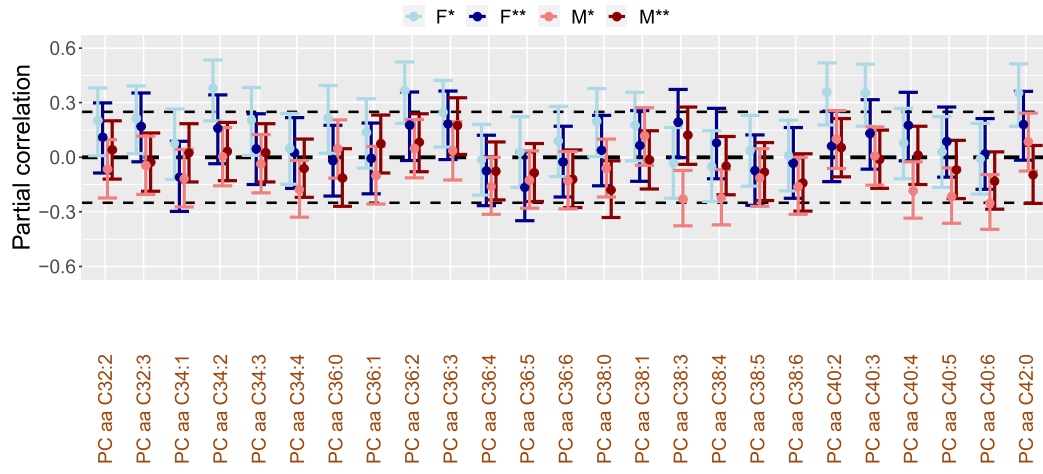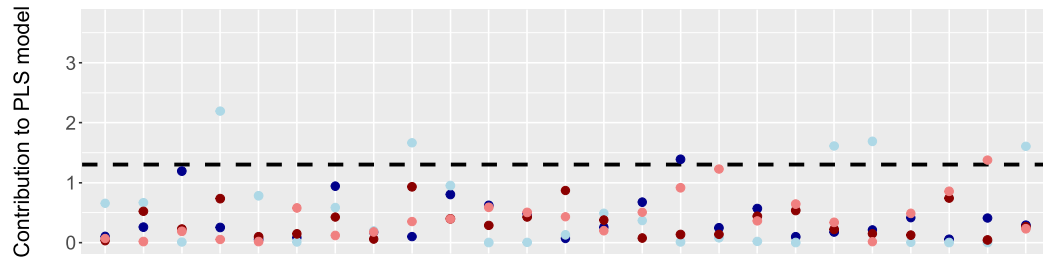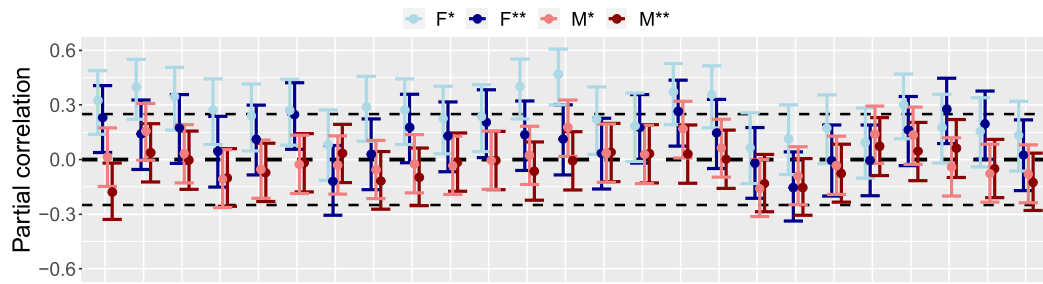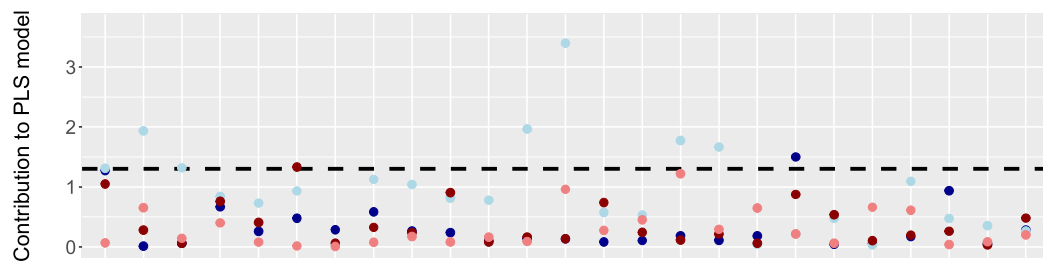

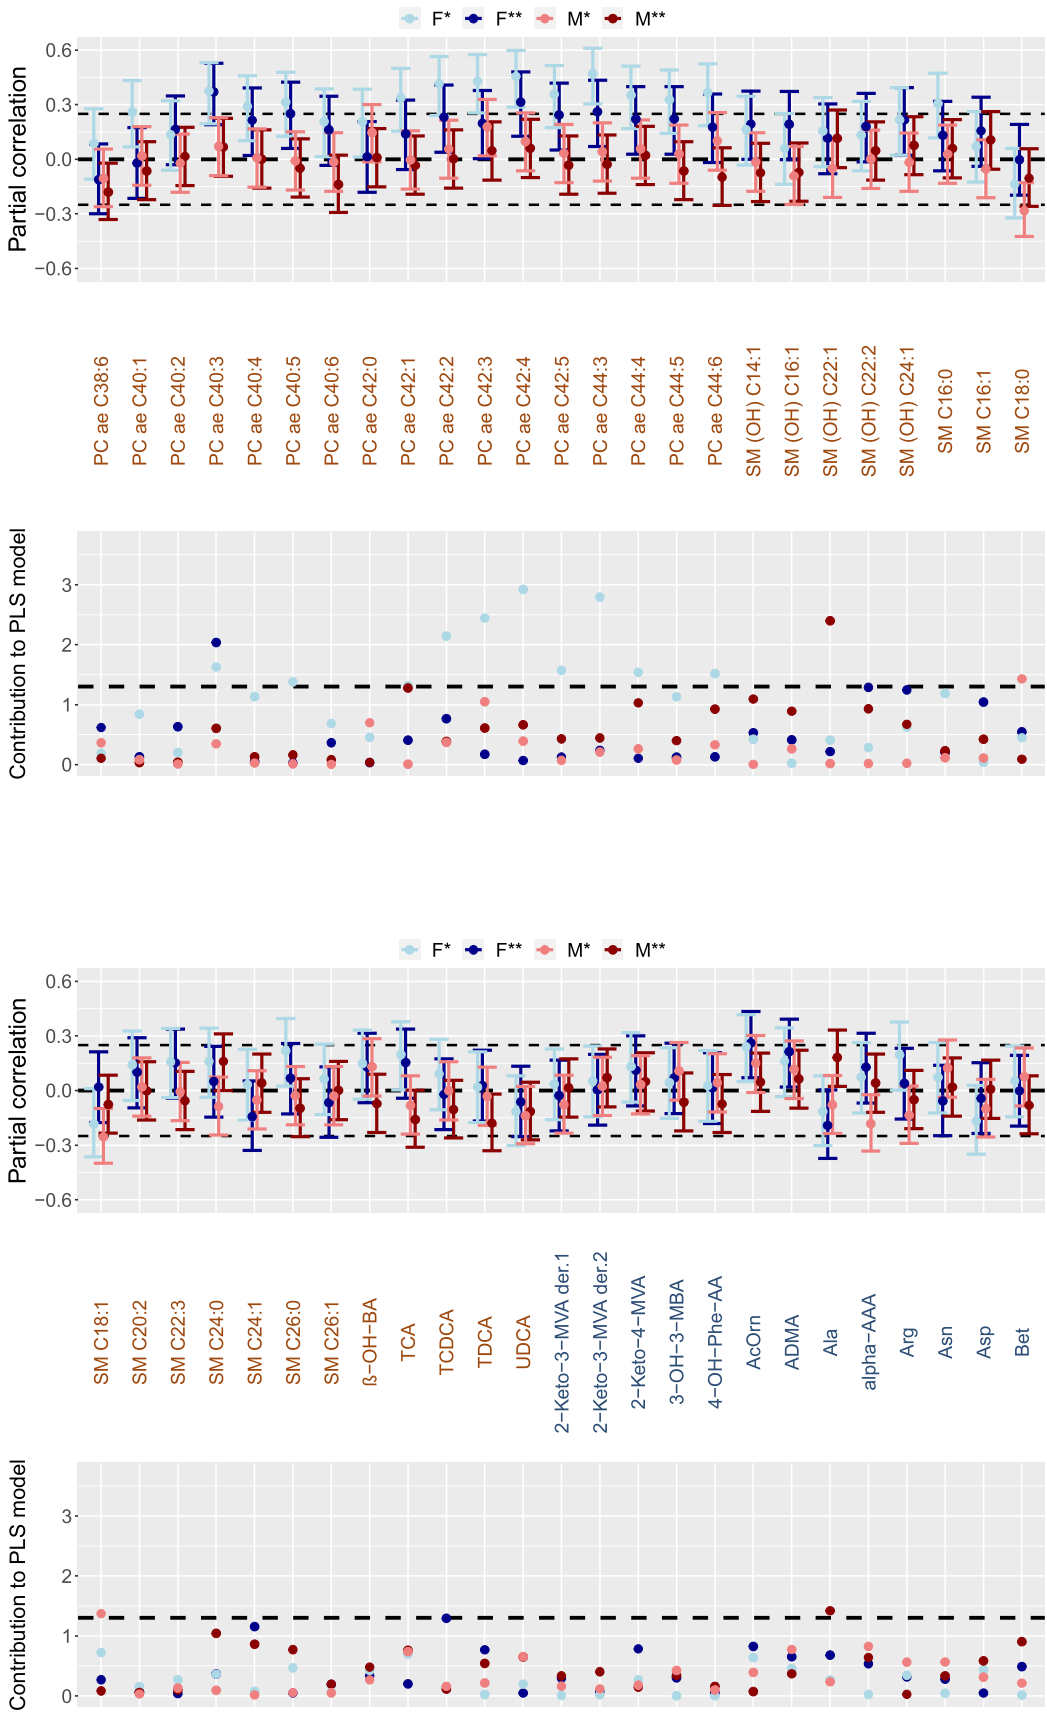

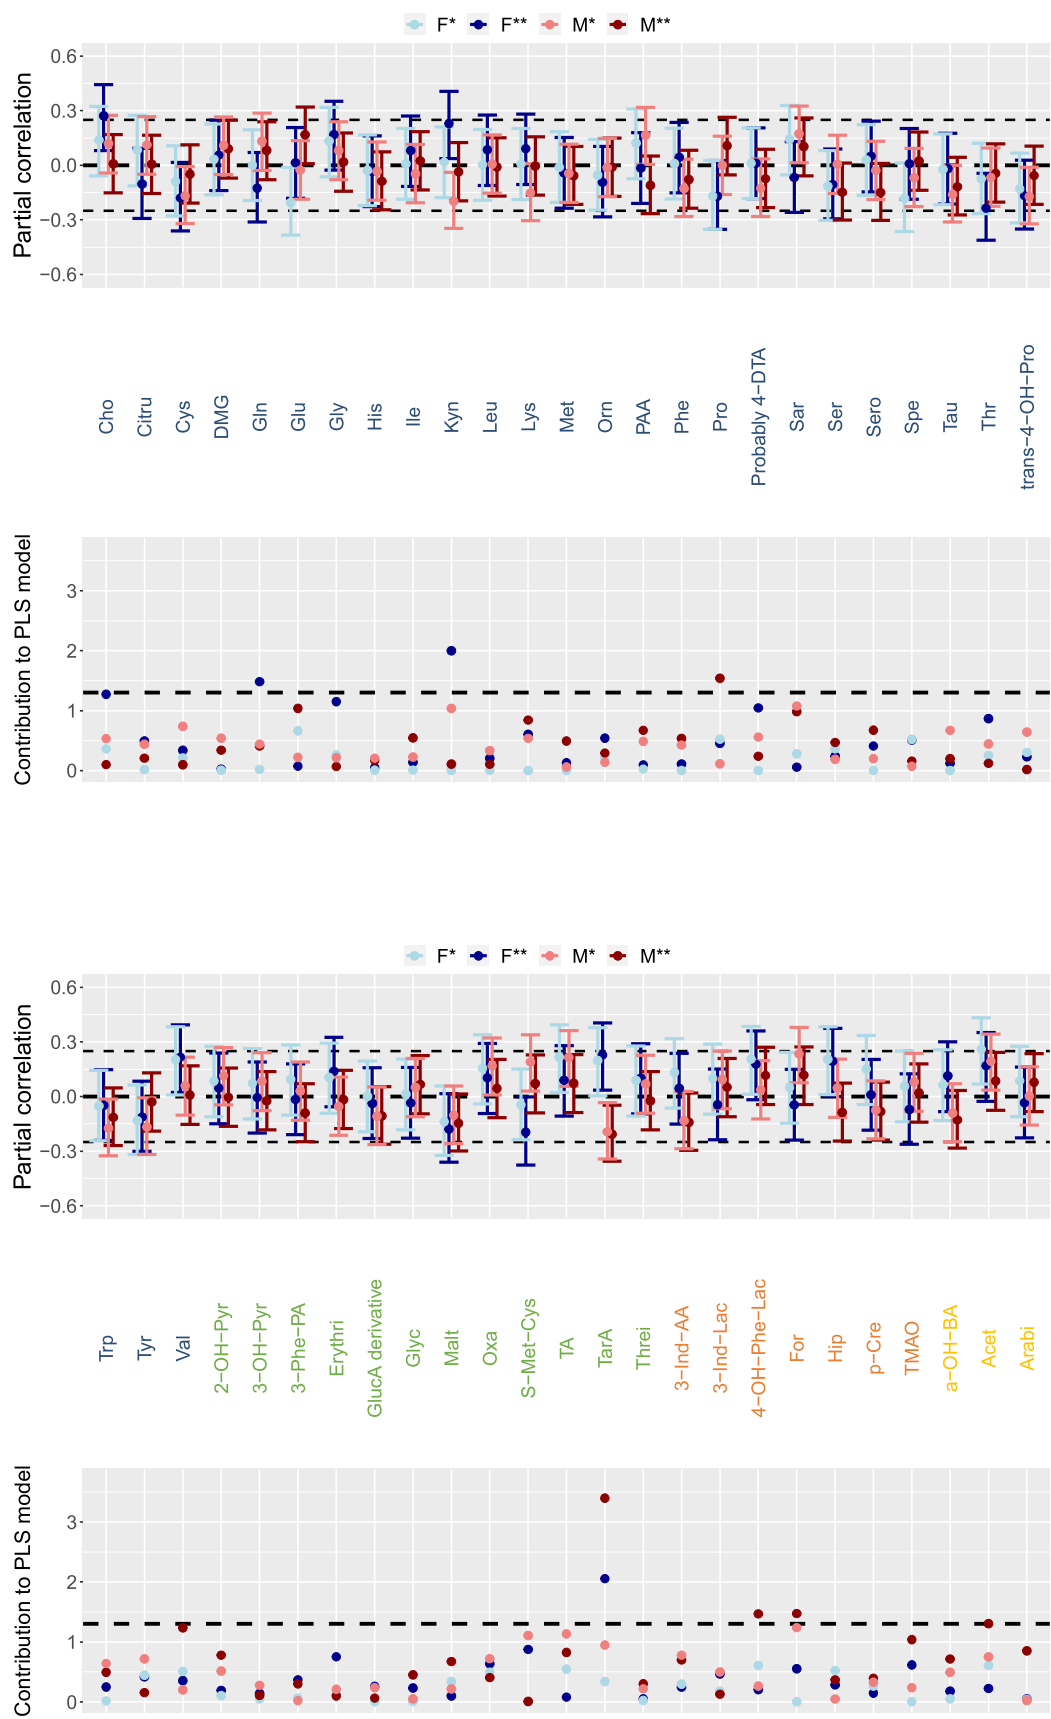

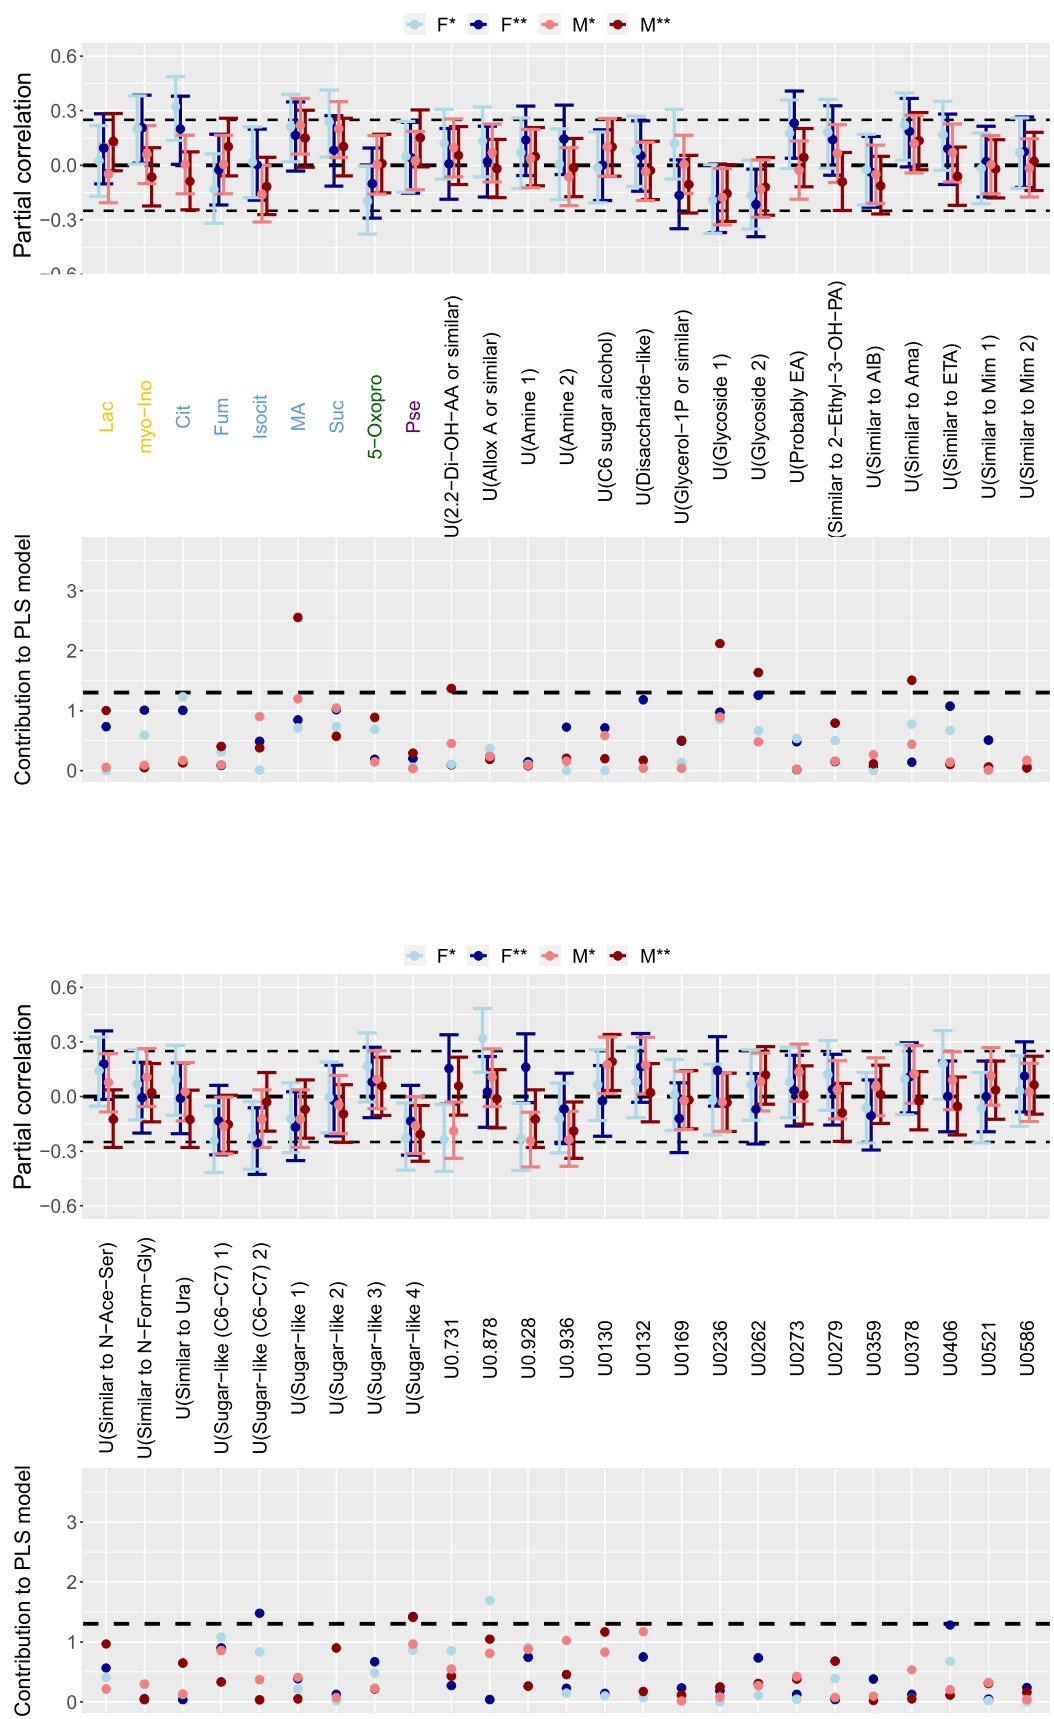

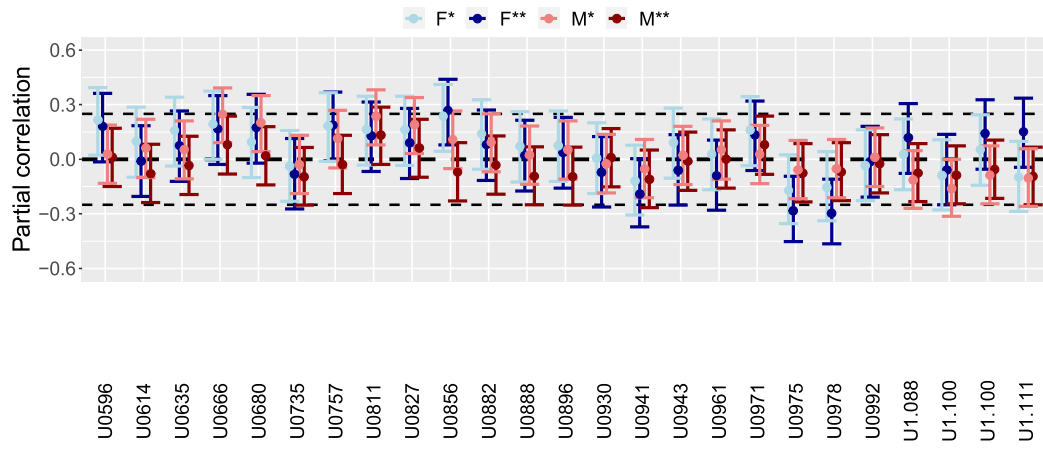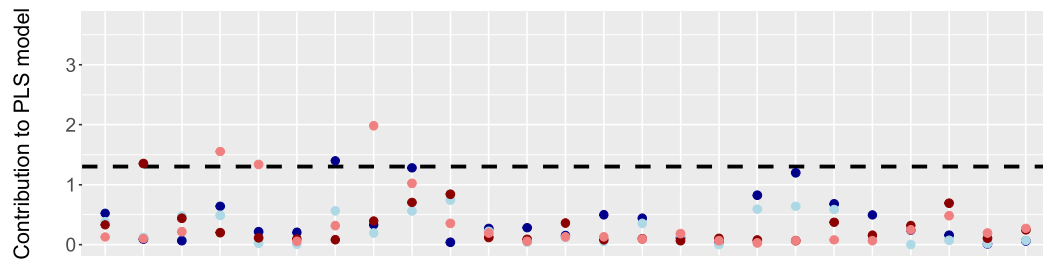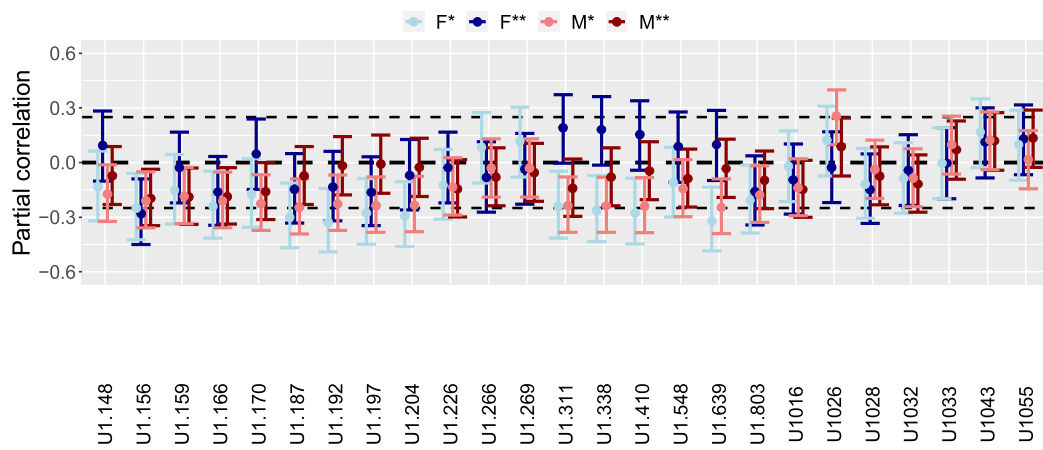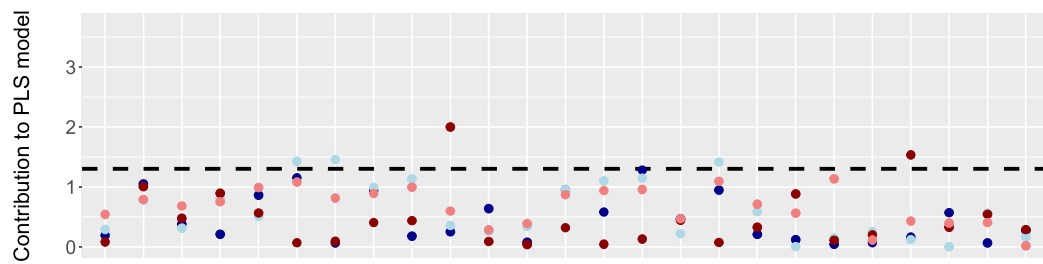

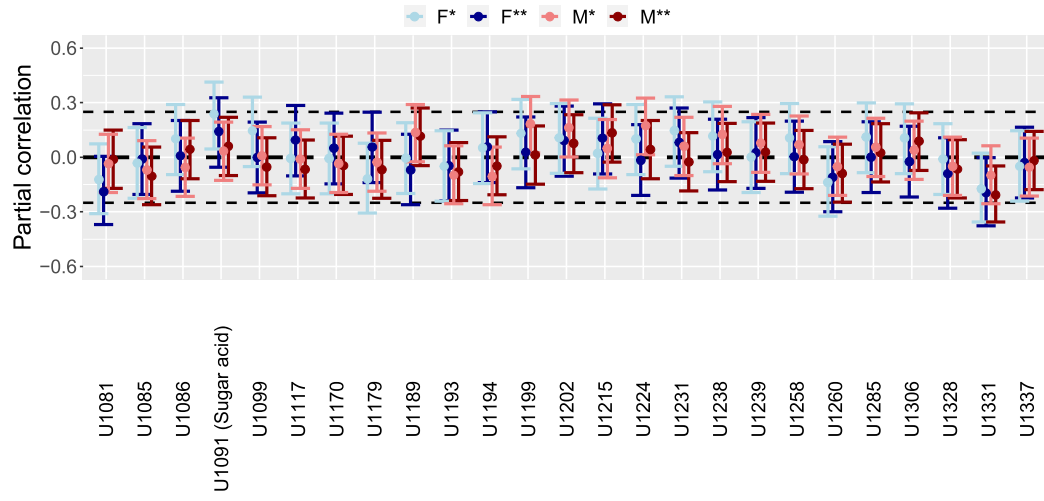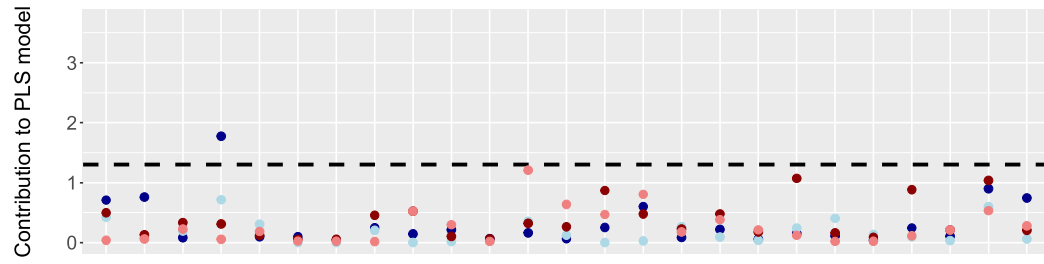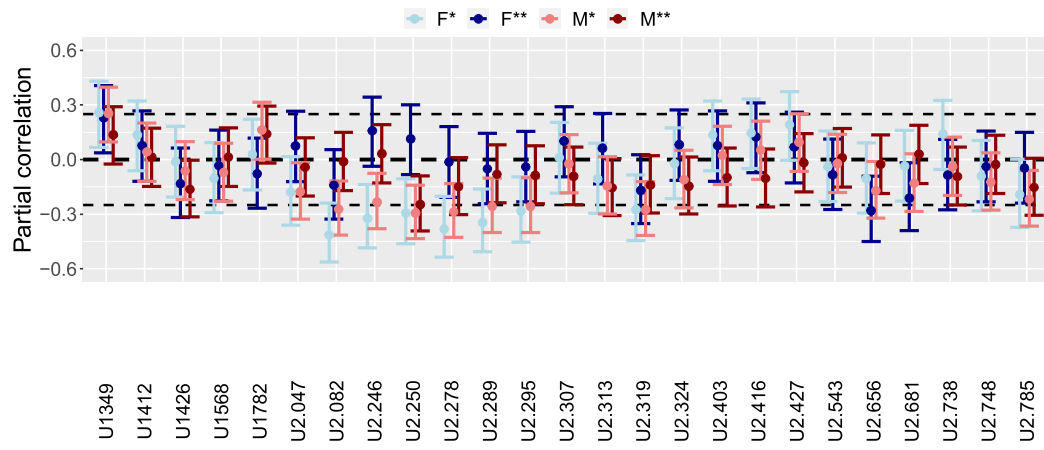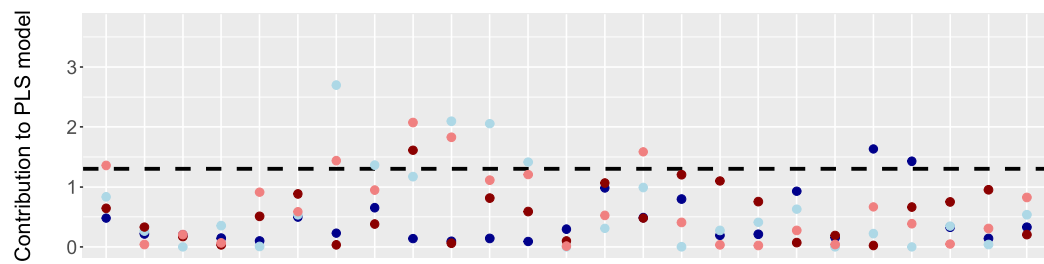

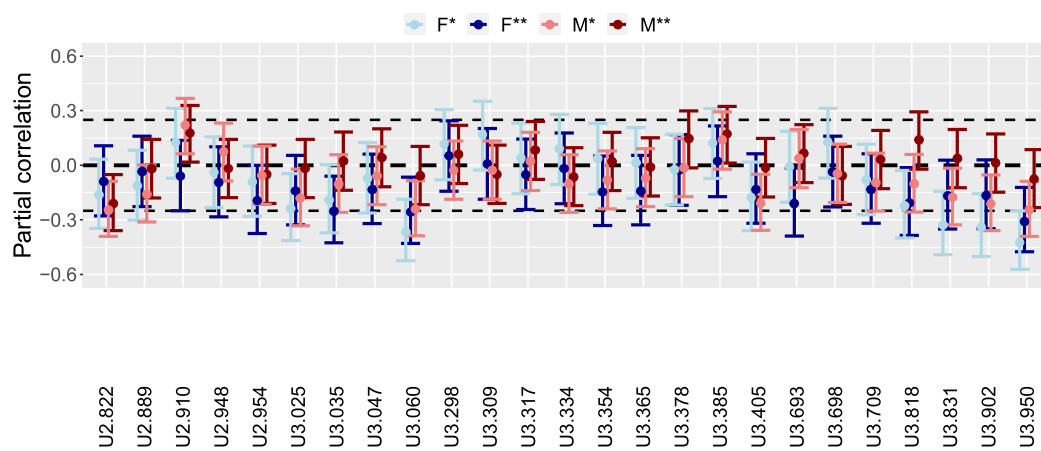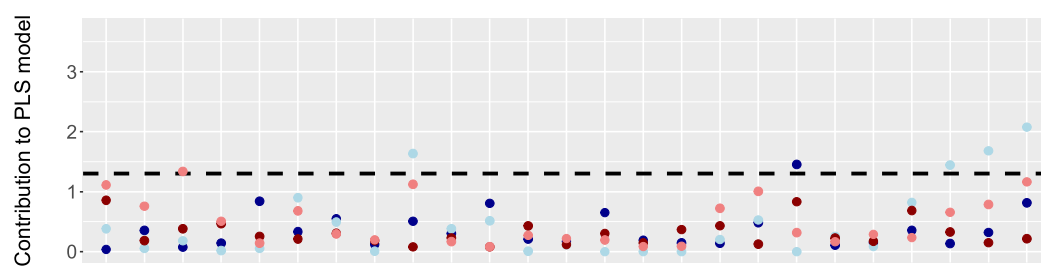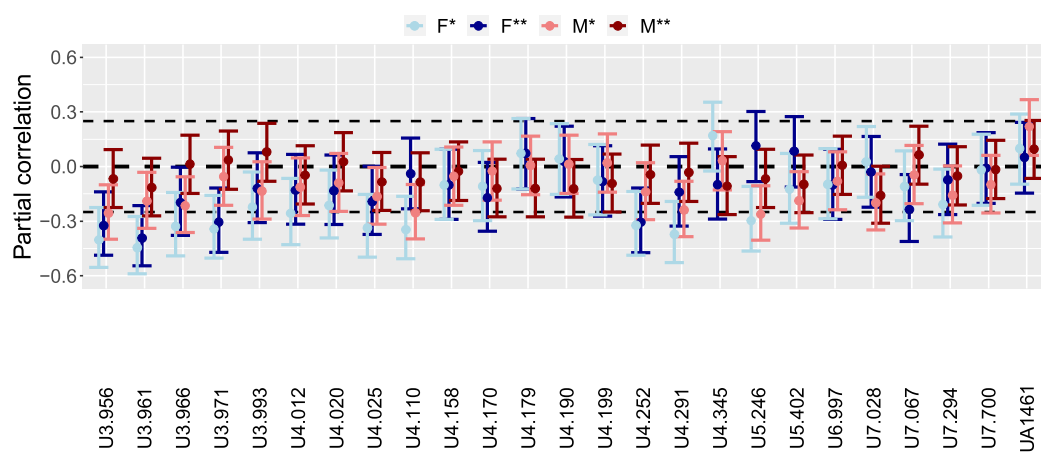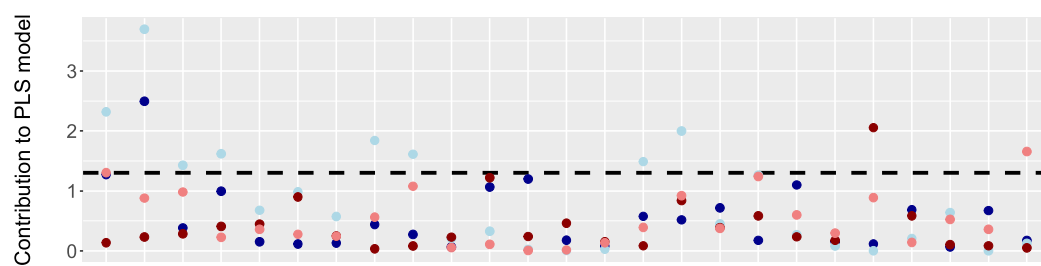

Supplement: s1 [file s1]
