# Supplementary material for: Sex-Specific Relationship between the Cardiorespiratory Fitness and Plasma Metabolite Patterns in Healthy Humans—Results of the KarMeN Study
Source: MDPI journal article supplement (doi:10.3390/metabo11070463), 2021-07-17
Supplement: s1 [file s1]

## File S1: Basic characteristics of the KarMeN participants according to VO<sub>2peak</sub> quarters

**Table 1. Characteristics of the female KarMeN participants (n=102) according to VO<sub>2peak</sub> quarters.**

| Characteristics                                              | VO <sub>2peak</sub> Quarters |                          |                          |                          | p*     |
|--------------------------------------------------------------|------------------------------|--------------------------|--------------------------|--------------------------|--------|
|                                                              | 1 <sup>st</sup> q (n=25)     | 2 <sup>nd</sup> q (n=26) | 3 <sup>rd</sup> q (n=26) | 4 <sup>th</sup> q (n=25) |        |
| VO <sub>2peak</sub> (mL kg <sup>-1</sup> min <sup>-1</sup> ) | 21.61 ± 2.14                 | 27.50 ± 1.66             | 32.89 ± 1.48             | 40.91 ± 2.94             | <.0001 |
| Age (years)                                                  | 62.26 ± 9.64                 | 57.10 ± 11.05            | 50.28 ± 10.92            | 33.71 ± 9.58             | <.0001 |
| Pre-/Post-Menopausal State <sup>Δ</sup>                      | 2/23                         | 7/19                     | 15/11                    | 22/3                     | <.0001 |
| Weight (kg)                                                  | 68.88 ± 9.11                 | 66.19 ± 7.23             | 60.97 ± 6.18             | 60.96 ± 7.00             | 0.0008 |
| Height (cm)                                                  | 164.16 ± 5.92                | 166.73 ± 6.63            | 166.79 ± 5.24            | 169.60 ± 7.21            | 0.0484 |
| BMI (kg/m <sup>2</sup> )                                     | 25.60 ± 3.43                 | 23.79 ± 1.92             | 21.92 ± 2.00             | 21.16 ± 1.79             | <.0001 |
| LBM (kg)                                                     | 39.36 ± 4.30                 | 40.60 ± 3.52             | 40.20 ± 3.06             | 41.10 ± 4.51             | 0.5504 |
| FM (%)                                                       | 39.24 ± 5.15                 | 35.12 ± 4.84             | 30.33 ± 4.92             | 28.68 ± 4.33             | <.0001 |
| VATM (kg)                                                    | 0.81 ± 0.48                  | 0.42 ± 0.25              | 0.25 ± 0.22              | 0.12 ± 0.10              | <.0001 |
| BMC (kg)                                                     | 2.24 ± 0.24                  | 2.31 ± 0.38              | 2.34 ± 0.25              | 2.46 ± 0.30              | 0.0567 |
| Hb (g dL <sup>-1</sup> )                                     | 13.72 ± 0.80                 | 13.53 ± 0.68             | 13.46 ± 0.59             | 13.33 ± 0.87             | 0.408  |
| Glucose (mg dL <sup>-1</sup> )                               | 89.64 ± 8.14                 | 85.27 ± 7.59             | 82.42 ± 6.47             | 82.04 ± 7.28             | 0.0034 |
| Insulin (μIU mL <sup>-1</sup> )                              | 10.32 ± 4.49                 | 9.03 ± 2.96              | 8.53 ± 3.42              | 10.52 ± 4.47             | 0.2199 |
| HbA1c (%)                                                    | 5.47 ± 0.30                  | 5.61 ± 0.37              | 5.42 ± 0.29              | 5.19 ± 0.44              | 0.0065 |
| TGs (mg dL <sup>-1</sup> )                                   | 102.24 ± 35.38               | 85.04 ± 32.93            | 64.96 ± 18.12            | 62.72 ± 14.95            | <.0001 |
| HDL cholesterol (mg dL <sup>-1</sup> )                       | 69.68 ± 12.98                | 79.15 ± 17.16            | 82.19 ± 18.84            | 79.36 ± 13.78            | 0.0198 |
| LDL cholesterol (mg dL <sup>-1</sup> )                       | 145.00 ± 30.37               | 137.35 ± 32.86           | 123.08 ± 32.04           | 104.24 ± 27.54           | <.0001 |
| HR <sub>rest</sub> (1 min <sup>-1</sup> )                    | 67.56 ± 7.83                 | 66.23 ± 7.56             | 64.19 ± 10.14            | 64.84 ± 8.58             | 0.5298 |
| BP systolic (mmHg)                                           | 128.44 ± 16.57               | 124.85 ± 16.93           | 113.50 ± 12.90           | 106.72 ± 7.17            | <.0001 |
| BP diastolic (mmHg)                                          | 88.68 ± 9.22                 | 86.04 ± 8.53             | 78.65 ± 10.51            | 74.52 ± 8.21             | <.0001 |
| PWV (m s <sup>-1</sup> ) <sup>°</sup>                        | 9.73 ± 1.76                  | 9.28 ± 2.20              | 7.69 ± 1.16              | 6.64 ± 0.81              | <.0001 |
| VC <sub>max</sub> (L)                                        | 3.25 ± 0.46                  | 3.61 ± 0.54              | 3.66 ± 0.42              | 4.04 ± 0.68              | <.0001 |
| FEV1 (L)                                                     | 2.47 ± 0.40                  | 2.75 ± 0.40              | 2.79 ± 0.42              | 3.36 ± 0.63              | <.0001 |
| AEE (kcal d <sup>-1</sup> )                                  | 639.36 ± 199.65              | 782.77 ± 296.70          | 754.42 ± 185.38          | 777.48 ± 257.39          | 0.0814 |
| Total MET (MET-min week <sup>-1</sup> )                      | 6469.8 ± 4065.7              | 7032.8 ± 4450.5          | 6518.1 ± 3337.5          | 3920.3 ± 2099.1          | 0.0008 |
| HEI-NVS                                                      | 73.86 ± 9.62                 | 69.82 ± 9.99             | 76.15 ± 10.38            | 73.24 ± 8.38             | 0.1805 |

Based on the VO<sub>2peak</sub> quartiles in the female subgroup, the VO<sub>2peak</sub> data were divided into four quarters (q) and basic characteristics of the subgroups of the corresponding females of the quarters are presented. Data are given in mean ± SD. <sup>Δ</sup>: number of female participants in the pre-/post-menopausal state; <sup>°</sup> n=23 (1<sup>st</sup> q), n=25 (2<sup>nd</sup> q). \*: significant differences between quarters according to Welch ANOVA (Chi<sup>2</sup> test) for numeric (categorical) variables. AEE: activity energy expenditure; BMC: bone mineral content; BMI: body mass index; BP: blood pressure; FEV1: forced expiratory pressure in one second; FM: fat mass; Hb: hemoglobin; HDL: high-density lipoprotein; HEI-NVS: Healthy Eating Index (modified version); HR<sub>rest</sub>: resting heart rate; LBM: lean body mass; LDL: low-density lipoprotein; MET: metabolic equivalent of task; PWV: pulse wave velocity; TGs: triglycerides; VATM: visceral adipose tissue mass; VC<sub>max</sub>: maximal vital capacity; VO<sub>2peak</sub>: peak oxygen uptake.

**Table 2. Characteristics of the male KarMeN participants (n=150) according to VO<sub>2peak</sub> quarters.**

| Characteristics                                              | VO <sub>2peak</sub> Quarters |                          |                          |                          | p*     |
|--------------------------------------------------------------|------------------------------|--------------------------|--------------------------|--------------------------|--------|
|                                                              | 1 <sup>st</sup> q (n=37)     | 2 <sup>nd</sup> q (n=38) | 3 <sup>rd</sup> q (n=38) | 4 <sup>th</sup> q (n=37) |        |
| VO <sub>2peak</sub> (mL kg <sup>-1</sup> min <sup>-1</sup> ) | 30.77 ± 4.04                 | 40.32 ± 2.15             | 48.53 ± 2.26             | 58.45 ± 4.71             | <.0001 |
| Age (years)                                                  | 59.02 ± 14.37                | 45.12 ± 17.27            | 38.40 ± 13.69            | 27.62 ± 7.76             | <.0001 |
| Weight (kg)                                                  | 83.17 ± 10.35                | 79.42 ± 10.50            | 76.61 ± 9.85             | 75.15 ± 7.64             | 0.0025 |
| Height (cm)                                                  | 177.39 ± 7.24                | 180.74 ± 6.18            | 181.51 ± 8.99            | 180.89 ± 6.32            | 0.0809 |
| BMI (kg/m <sup>2</sup> )                                     | 26.40 ± 2.59                 | 24.27 ± 2.63             | 23.20 ± 2.10             | 22.98 ± 2.16             | <.0001 |
| LBM (kg)                                                     | 56.14 ± 5.95                 | 57.69 ± 6.60             | 57.74 ± 6.85             | 60.45 ± 6.76             | 0.0449 |
| FM (%)                                                       | 28.80 ± 3.92                 | 23.69 ± 5.17             | 20.77 ± 4.72             | 16.07 ± 4.19             | <.0001 |
| VATM (kg)                                                    | 1.70 ± 0.74                  | 0.77 ± 0.55              | 0.50 ± 0.44              | 0.26 ± 0.15              | <.0001 |
| BMC (kg)                                                     | 3.19 ± 0.41                  | 3.11 ± 0.42              | 3.27 ± 0.45              | 3.27 ± 0.44              | 0.3633 |
| Hb (g dL <sup>-1</sup> )                                     | 15.11 ± 1.15                 | 14.95 ± 0.80             | 15.01 ± 0.85             | 15.07 ± 0.75             | 0.8748 |
| Glucose (mg dL <sup>-1</sup> )                               | 90.57 ± 9.73                 | 86.63 ± 7.95             | 84.50 ± 6.55             | 83.35 ± 7.52             | 0.004  |
| Insulin (μIU mL <sup>-1</sup> )                              | 10.86 ± 4.36                 | 10.99 ± 6.52             | 9.06 ± 3.10              | 9.49 ± 2.86              | 0.1293 |
| HbA1c (%)                                                    | 5.54 ± 0.34                  | 5.37 ± 0.33              | 5.26 ± 0.28              | 5.25 ± 0.32              | 0.0012 |
| TGs (mg dL <sup>-1</sup> )                                   | 119.92 ± 45.84               | 100.95 ± 60.22           | 82.11 ± 37.49            | 81.05 ± 29.25            | 0.0002 |
| HDL cholesterol (mg dL <sup>-1</sup> )                       | 58.54 ± 13.51                | 61.32 ± 13.70            | 68.61 ± 16.00            | 62.68 ± 11.38            | 0.0376 |
| LDL cholesterol (mg dL <sup>-1</sup> )                       | 150.68 ± 43.95               | 117.74 ± 41.03           | 114.18 ± 33.45           | 97.65 ± 28.05            | <.0001 |
| HR <sub>rest</sub> (1 min <sup>-1</sup> )                    | 64.14 ± 10.35                | 63.26 ± 7.80             | 57.16 ± 7.58             | 55.95 ± 8.21             | <.0001 |
| BP systolic (mmHg)                                           | 133.41 ± 14.79               | 126.32 ± 14.42           | 126.08 ± 11.16           | 121.95 ± 10.96           | 0.0044 |
| BP diastolic (mmHg)                                          | 90.97 ± 9.59                 | 85.21 ± 9.21             | 82.53 ± 7.17             | 76.30 ± 8.62             | <.0001 |
| PWV (m s <sup>-1</sup> ) <sup>v</sup>                        | 8.39 ± 1.49                  | 7.23 ± 1.30              | 6.74 ± 0.85              | 6.17 ± 0.64              | <.0001 |
| VC <sub>max</sub> (L)                                        | 4.89 ± 0.90                  | 5.35 ± 0.87              | 5.61 ± 0.85              | 5.80 ± 0.72              | <.0001 |
| FEV1 (L)                                                     | 3.63 ± 0.75                  | 4.20 ± 0.80              | 4.39 ± 0.76              | 4.68 ± 0.66              | <.0001 |
| AEE (kcal d <sup>-1</sup> ) <sup>vv</sup>                    | 798.69 ± 499.28              | 1017.03 ± 562.34         | 1193.26 ± 483.33         | 1546.89 ± 625.66         | <.0001 |
| Total MET (MET-min week <sup>-1</sup> )                      | 6322.9 ± 5689.9              | 5985.5 ± 5072.6          | 4769.2 ± 3598.5          | 5921.7 ± 3937.6          | 0.3929 |
| HEI-NVS                                                      | 70.14 ± 10.97                | 72.15 ± 9.84             | 69.13 ± 8.78             | 72.39 ± 9.96             | 0.3828 |

Based on the VO<sub>2peak</sub> quartiles in the male subgroup, the VO<sub>2peak</sub> data were divided into four quarters (q) and basic characteristics of the subgroups of the corresponding males of the quarters are presented. Data are given in mean ± SD. <sup>v</sup> n=36 (1<sup>st</sup> q); <sup>vv</sup> n=35 (1<sup>st</sup> q), n=37 (2<sup>nd</sup> q). \*: significant differences between quarters according to Welch ANOVA. AEE: activity energy expenditure; BMC: bone mineral content; BMI: body mass index; BP: blood pressure; FEV1: forced expiratory pressure in one second; FM: fat mass; Hb: hemoglobin; HDL: high-density lipoprotein; HEI-NVS: Healthy Eating Index (modified version); HR<sub>rest</sub>: resting heart rate; LBM: lean body mass; LDL: low-density lipoprotein; MET: metabolic equivalent of task; PWV: pulse wave velocity; TGs: triglycerides; VATM: visceral adipose tissue mass; VC<sub>max</sub>: maximal vital capacity; VO<sub>2peak</sub>: peak oxygen uptake.
