# Supplementary material for: Sex-Specific Relationship between the Cardiorespiratory Fitness and Plasma Metabolite Patterns in Healthy Humans—Results of the KarMeN Study
Source: MDPI journal article supplement (doi:10.3390/metabo11070463), 2021-07-17
Supplement: s1 [file s1]

## File S3: Classification of metabolites with significant bivariate correlations to metabolic pathways

### 1. Confounder-adjusted correlations in females (F\*)

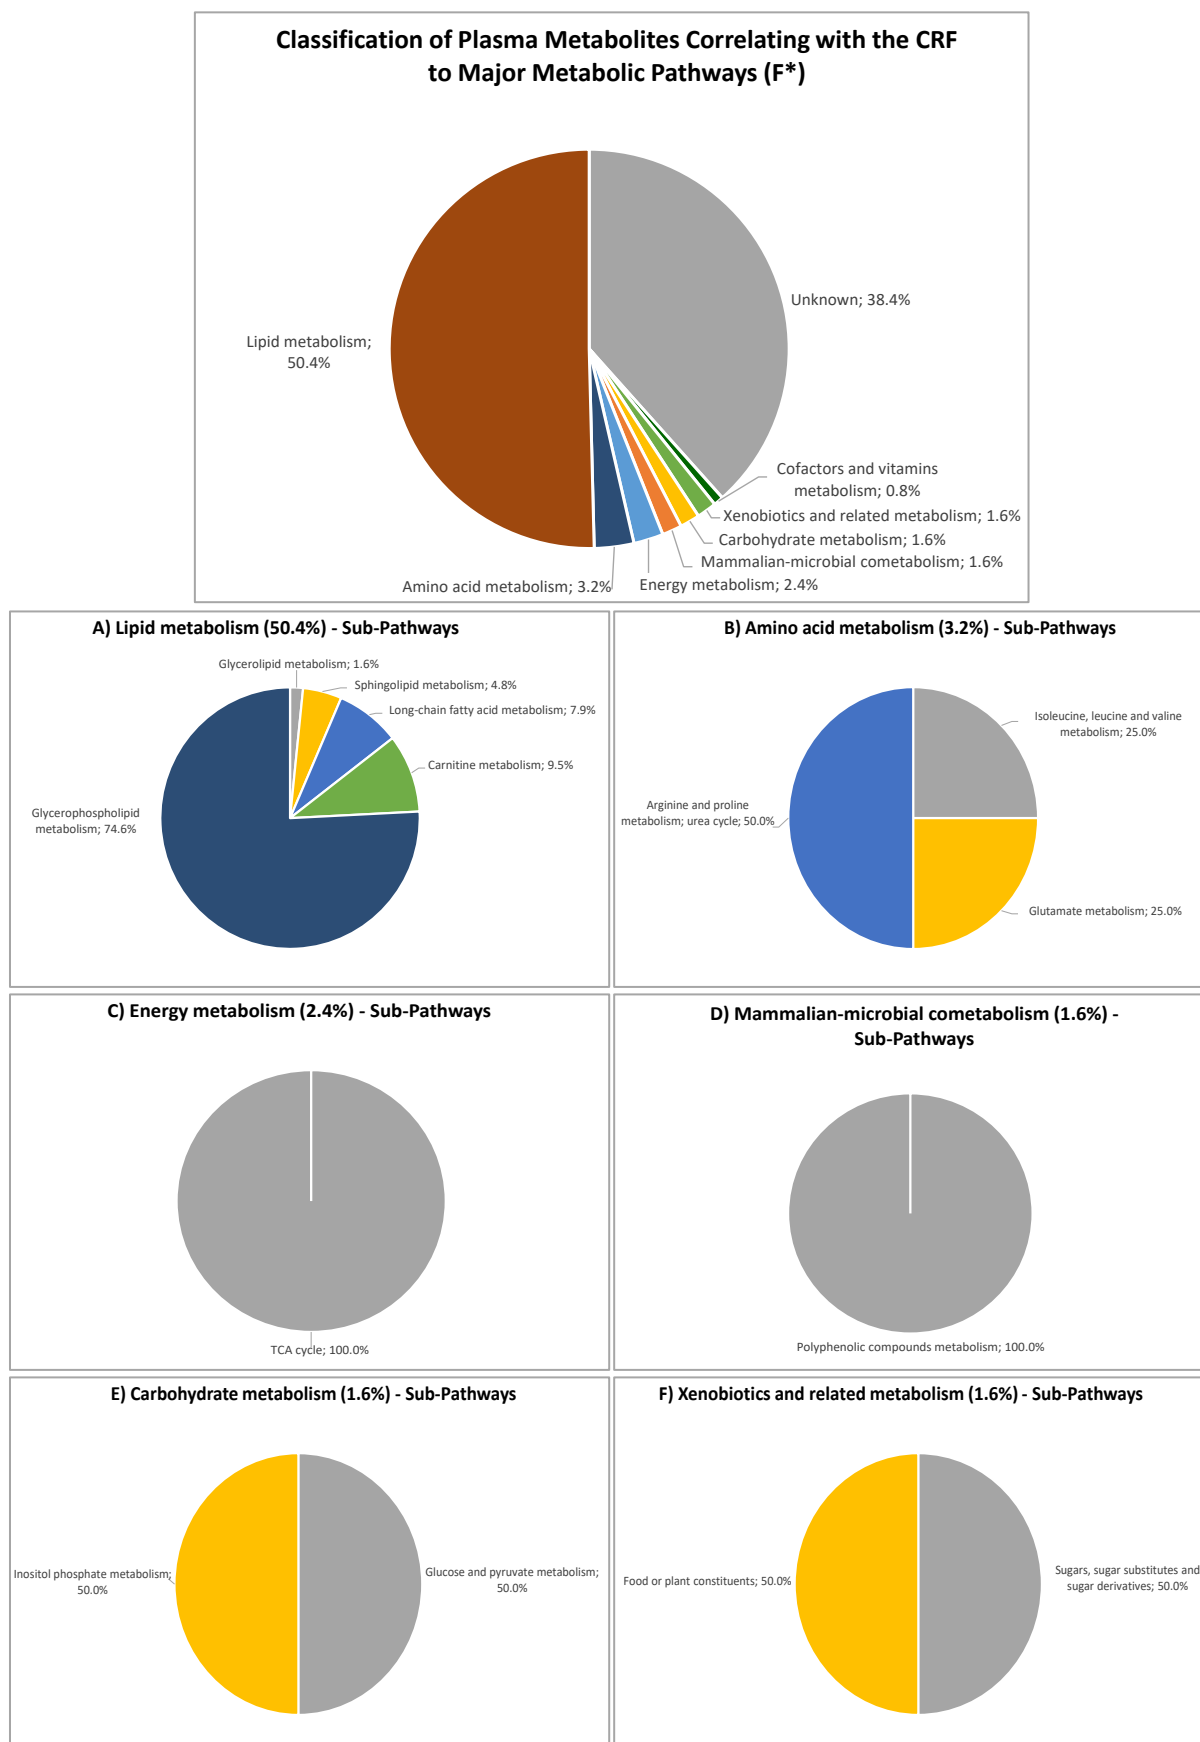

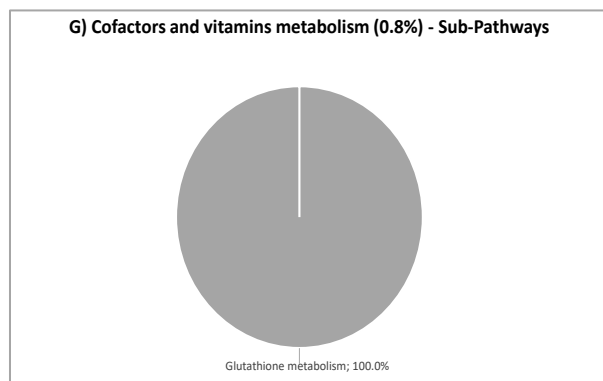

**Figure 1. Classification of CRF-correlated metabolites to major metabolic pathways and sub-pathways (females).** 125 plasma metabolites showed significant bivariate correlations with the CRF in females (after adjusting for confounders). Most of them belong to lipid metabolism (63/125) and amino acid metabolism (4/125), followed by energy metabolism (3/125) and mammalian-microbial, carbohydrate or xenobiotics-related metabolism (each 2/125) and cofactors and vitamins metabolism (1/125). 48 plasma analytes were unknown.

## 2. Confounder- and clinical/phenotypical variables-adjusted correlations in females (F\*\*)

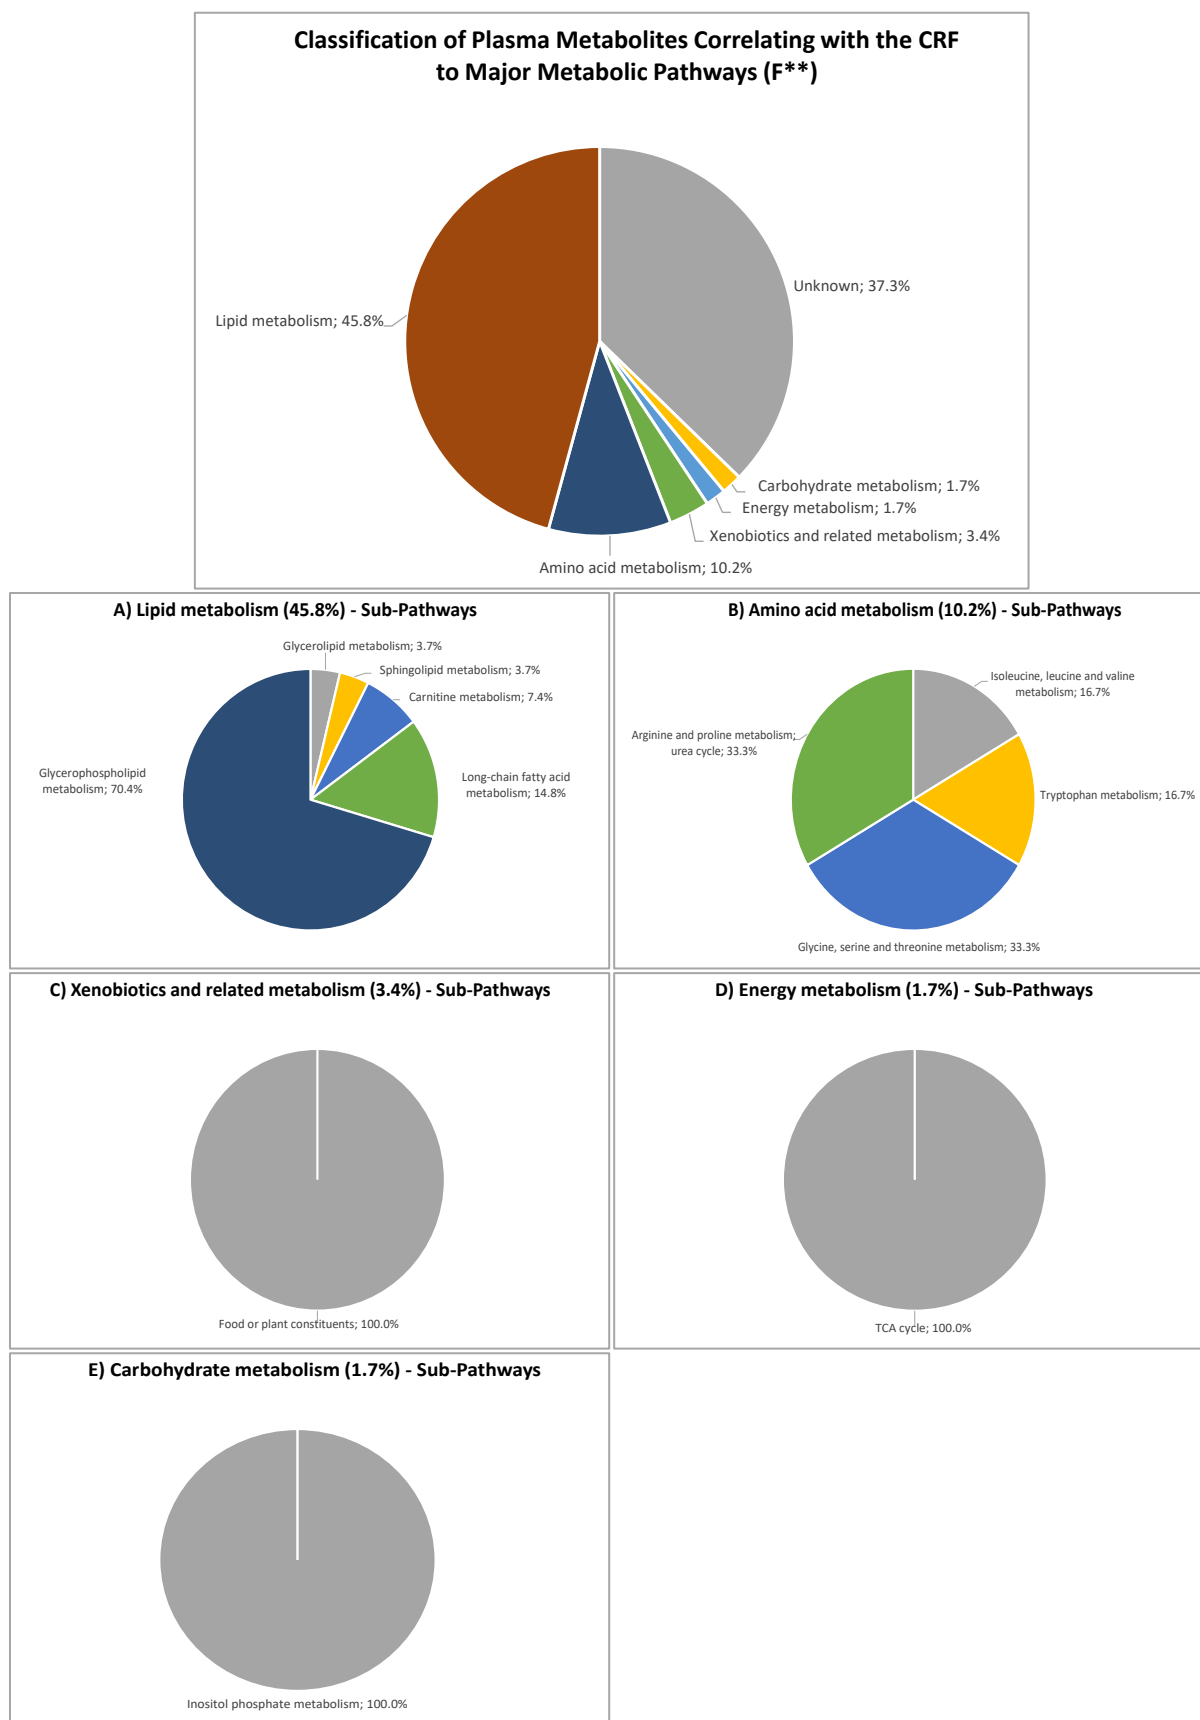

**Figure 2. Classification of CRF-correlated metabolites to major metabolic pathways and sub-pathways (females).**

59 plasma metabolites showed significant bivariate correlations with the CRF in females (after adjusting for confounders and phenotypical/clinical variables). Most of them belong to lipid metabolism (27/59) and amino acid metabolism (6/59), followed by xenobiotics and related metabolism (2/59), energy or carbohydrate metabolism (each 1/59). 22 plasma analytes were unknown.

### 3. Confounder-adjusted correlations in males (M\*)

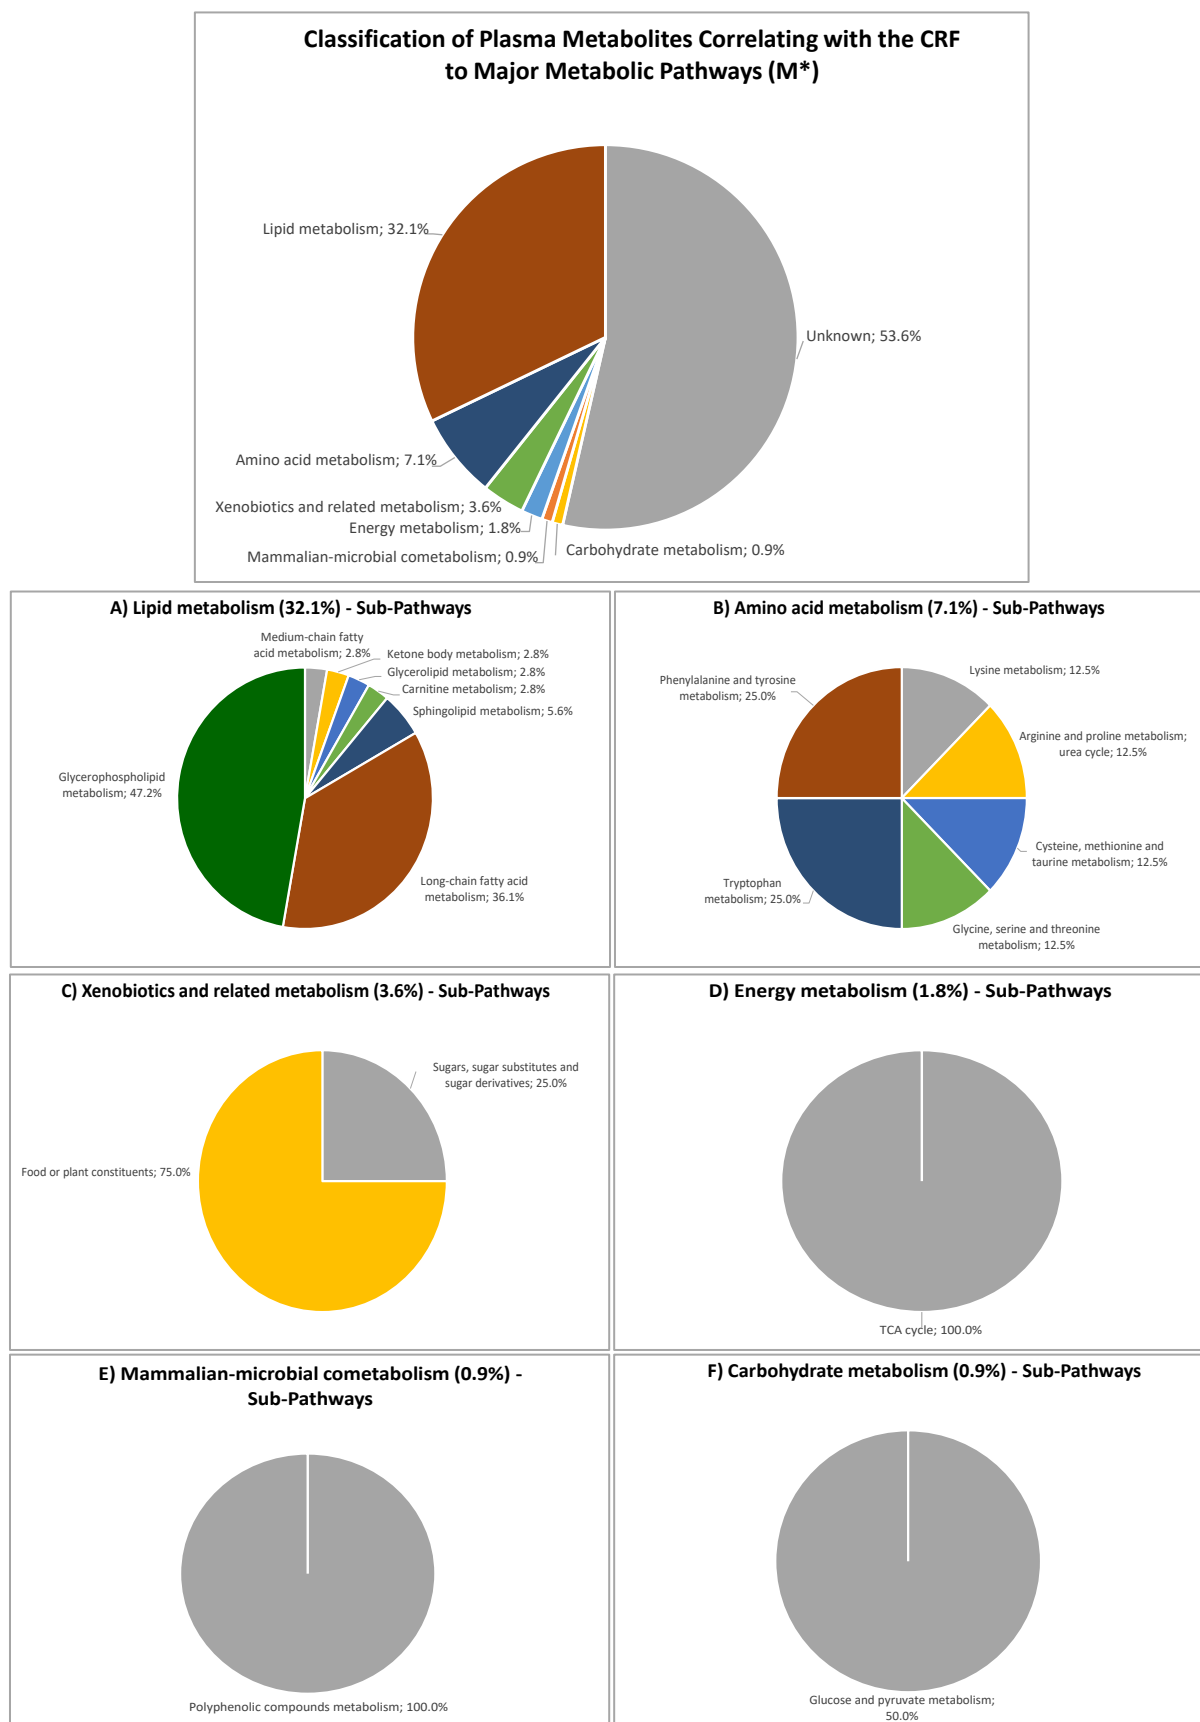

**Figure 3. Classification of CRF-correlated metabolites to major metabolic pathways and sub-pathways (males).**

112 plasma metabolites showed significant bivariate correlations with the CRF in males (after adjusting for confounders). Most of them belong to lipid metabolism (36/112) and amino acid metabolism (8/112), followed by xenobiotics and related metabolism (4/112), energy metabolism (2/112) and carbohydrate or mammalian-microbial (co-)metabolism (each 1/112). 60 plasma analytes were unknown.

#### 4. Confounder- and clinical/phenotypical variables-adjusted correlations in males (M\*\*)

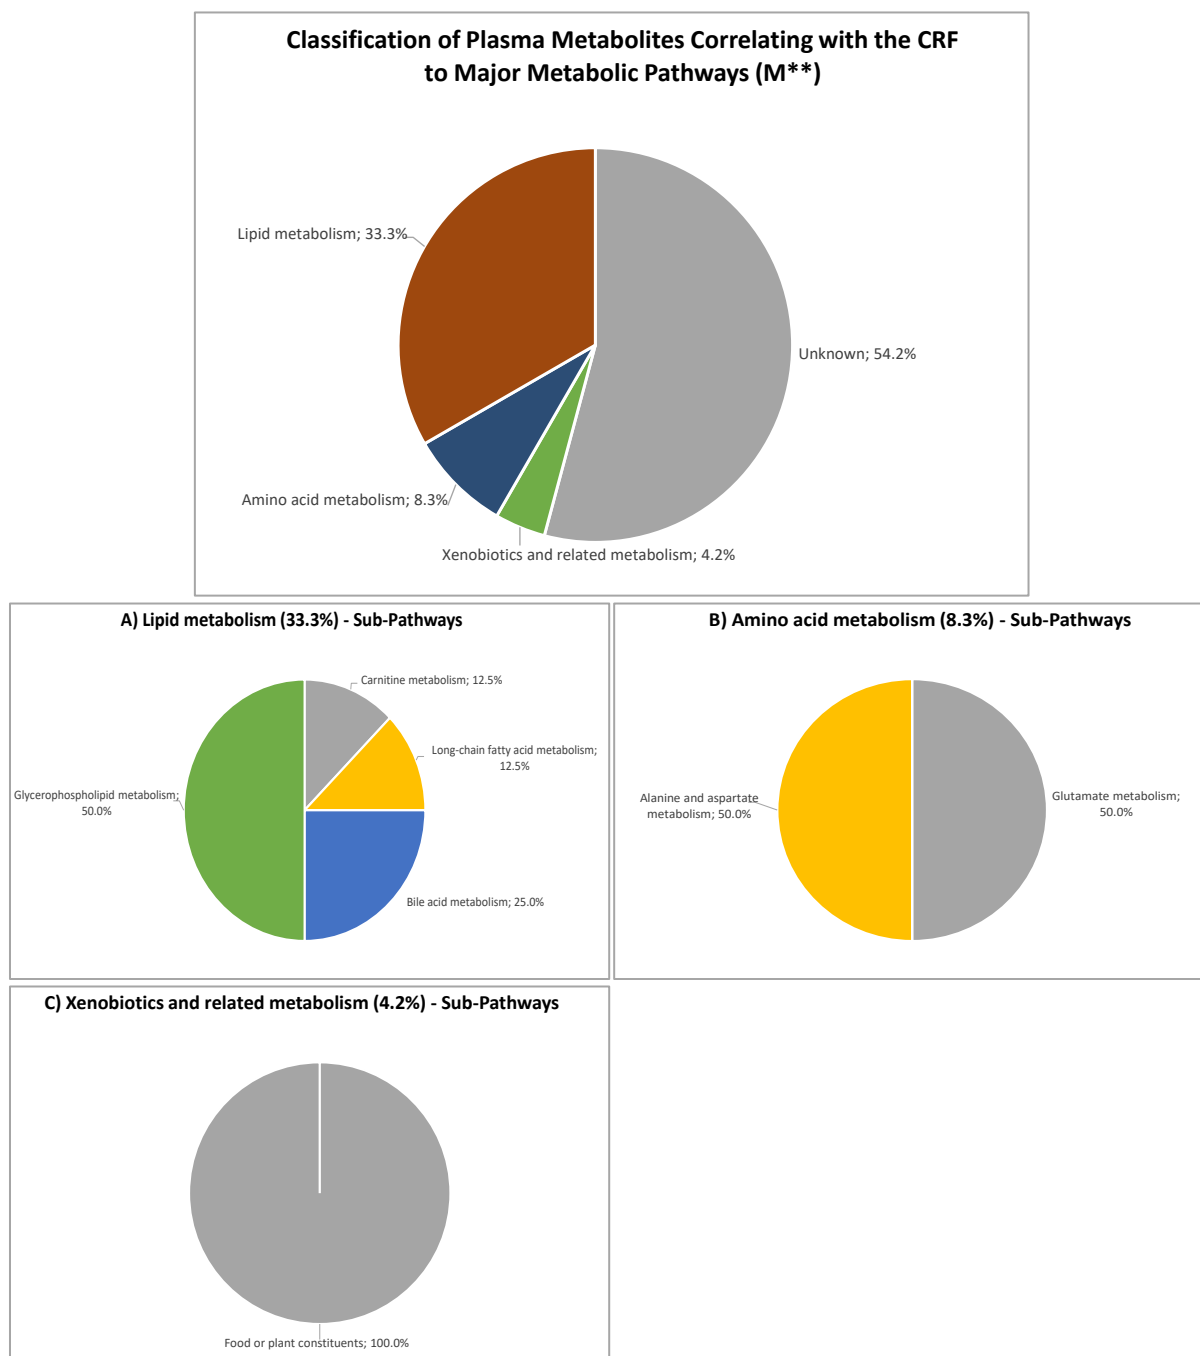

**Figure 4. Classification of CRF-correlated metabolites to major metabolic pathways and sub-pathways (males).**

24 plasma metabolites showed significant bivariate correlations with the CRF in males (after adjusting for confounders and phenotypical/clinical variables). Most of them belong to lipid metabolism (8/24) and amino acid metabolism (2/24), followed by xenobiotics and related metabolism (1/24). 13 plasma analytes were unknown.
