# Supplementary material for: Sex-Specific Relationship between the Cardiorespiratory Fitness and Plasma Metabolite Patterns in Healthy Humans—Results of the KarMeN Study
Source: MDPI journal article supplement (doi:10.3390/metabo11070463), 2021-07-17
Supplement: s1 [file s1]

# File S4: Evaluation of PLS approaches

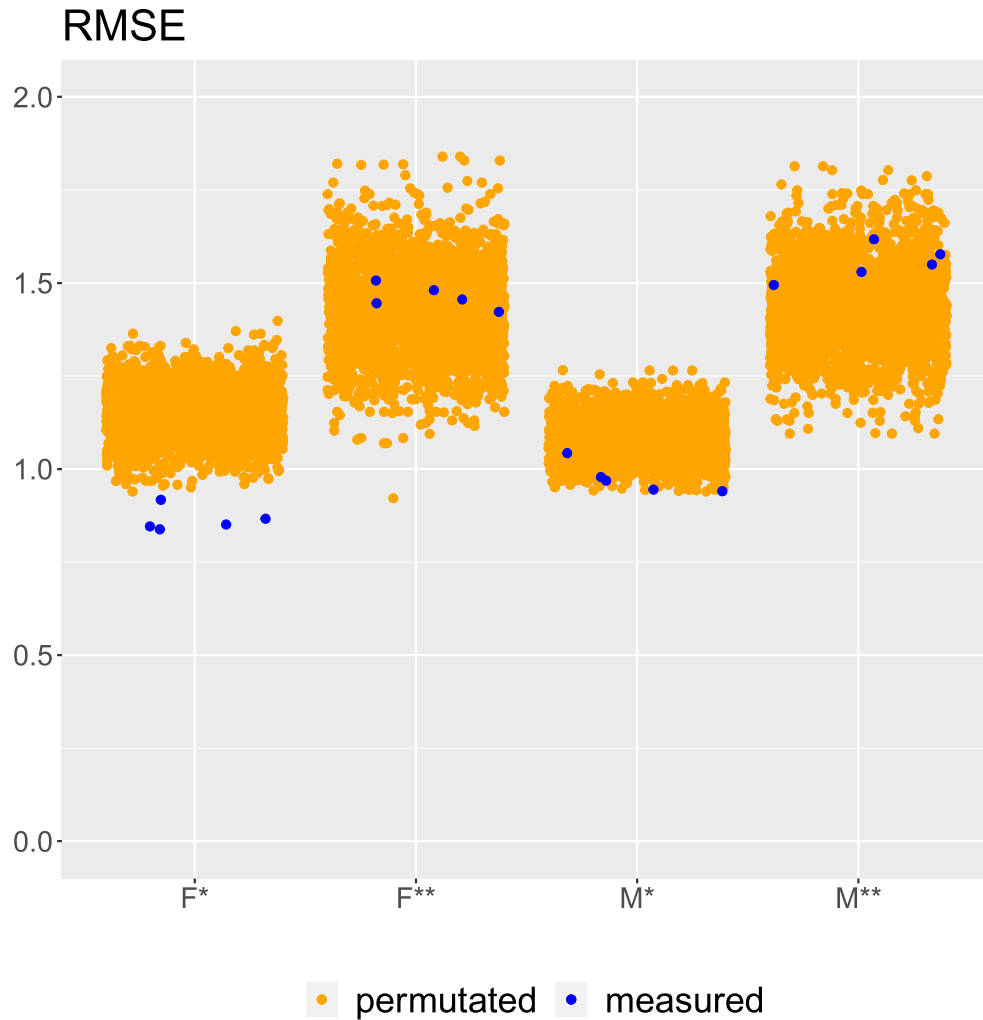

Mean of the root mean squares errors (RMSE) on the test samples across the 20 repetitions of the pls approaches. Blue: 5 repetitions for each subgroup using the original data. Orange: 2500 permutation for each subgroup.

- F\* Females adjusted for age and menopausal status
- F\*\* Females adjusted for age, menopausal status and the 21 phenotypical and clinical parameters
- M\* Males adjusted for age
- M\*\* Males adjusted for age and the 21 phenotypical and clinical parameters
