# Supplementary material for: Sex-Specific Relationship between the Cardiorespiratory Fitness and Plasma Metabolite Patterns in Healthy Humans—Results of the KarMeN Study
Source: MDPI journal article supplement (doi:10.3390/metabo11070463), 2021-07-17
Supplement: s1 [file s1]

## File S5 Volcano plots of VO<sub>2</sub>peak-associated plasma metabolite patterns

- F\* Females adjusted for age and menopausal status  
 F\*\* Females adjusted for age, menopausal status and the 21 phenotypical and clinical parameters  
 M\* Males adjusted for age  
 M\*\* Males adjusted for age and the 21 phenotypical and clinical parameters

### Major Metabolic Pathways:

- Lipid metabolism      Amino acid metabolism      Xenobiotics and related metabolism  
 Energy metabolism      Carbohydrate metabolism      Mammalian-microbial cometabolism  
 Nucleotide metabolism      Cofactors and vitamins metabolism      Unknown

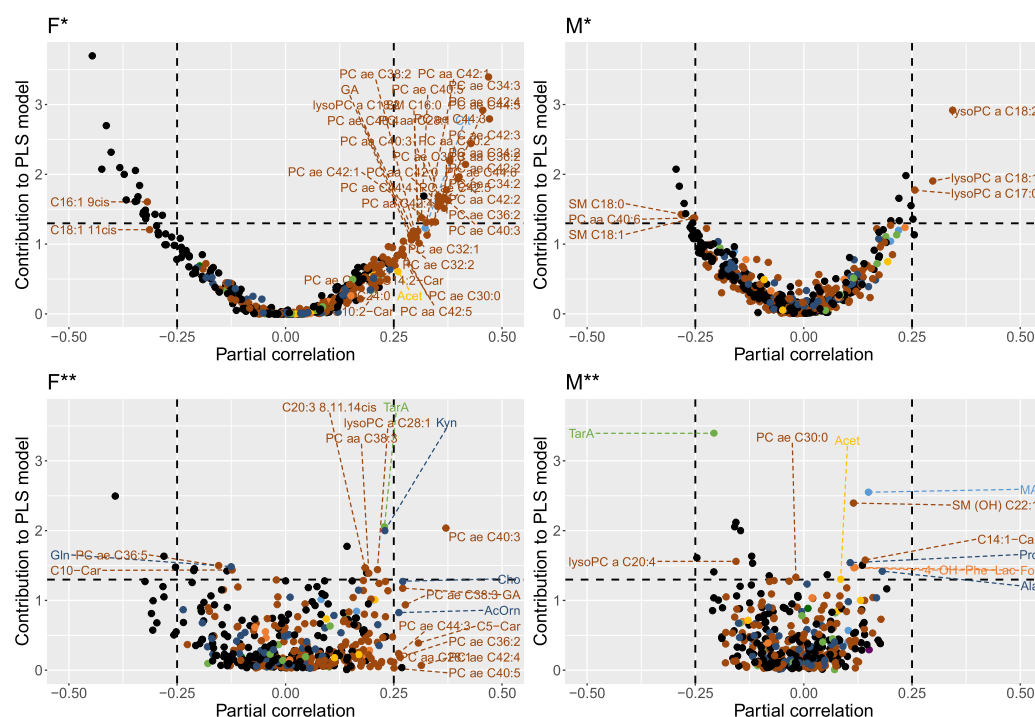

Volcano plots illustrating sex-specific plasma metabolite patterns associated with the VO<sub>2</sub>peak for each subgroup. The y-axis represents the importance of contribution of each metabolite to the multivariate association with the VO<sub>2</sub>peak, expressed as the negative logarithm of relative frequencies of permutation-obtained rank products below measured rank products. The x-axis illustrates the direction and strength of bivariate associations between the VO<sub>2</sub>peak and metabolites, expressed as partial Pearson correlation coefficients of Van der Waerden-transformed variables. The classification of metabolites to major metabolic pathways is color-coded. The mean of the root mean square error (RMSE) based on the test samples was not always higher in the permutations when additionally controlling for phenotypical and clinical variables. Therefore, the respective results from multivariate association analyses (F\*\*/M\*\*) have to be interpreted with caution.
